# Supplementary material
Source: publisher figshare collection journal article supplement (https://acs.figshare.com/ndownloader/files/4179424)
Supplement: Supplementary file 1 [file 4179424]

# **Tin Oxide Nanosheet-Assembly for Hydrophobic/Hydrophilic Coating and Cancer Sensing**

Yoshitake Masuda, Tatsuki Ohji, Kazumi Kato

*National Institute of Advanced Industrial Science and Technology (AIST), 2266-98 Anagahora,  
Shimoshidami, Moriyama-ku, Nagoya 463-8560, Japan*

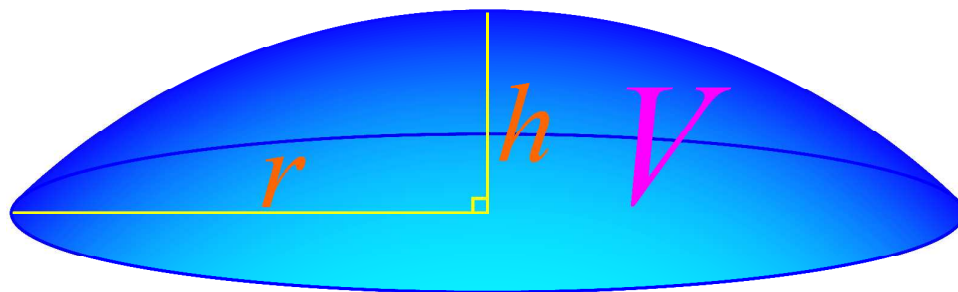

$$V = \frac{\pi h}{6} (3r^3 + h^2)$$

$V$  : volume of a droplet,  $1 \text{ mm}^3$  ( $1 \mu\text{l}$ ),  $r$  : radius of a droplet,  $5 \text{ mm}$ ,  $h$  : height of a droplet ( $\text{mm}$ )

Figure S1. Model of a droplet for estimation of height.
